# Supplementary material for: A closer examination of the coupling between ionic hydrogen bond (IHB) stretching and flanking group motions in (CH3OH)2H+: the strong isotope effects
Source: Royal Society of Chemistry journal article supplement (doi:10.1039/c6cp00309e), 2016-01-01
Supplement: c6cp00309e1.pdf [file c6cp00309e1.pdf]

## Supplementary Information for

# A Closer Examination of the coupling between Ionic Hydrogen Bond (IHB) Stretch and Flanking Group motions in $(\text{CH}_3\text{OH})_2\text{H}^+$ : The Strong Isotope Effects

Jake A. Tan,<sup>a,b,c</sup> and Jer-Lai Kuo\*<sup>a,c</sup>

<sup>a</sup> Molecular Science and Technology Program, Taiwan International Graduate Program, Academia Sinica, 128 Academia Road, Section 2, Nangang, Taipei 115, Taiwan

<sup>b</sup> Department of Chemistry, National Tsing Hua University, 101 Kuang-Fu Road, Section 2, Hsinchu 30013, Taiwan

<sup>c</sup> Institute of Atomic and Molecular Sciences, Academia Sinica, No.1 Roosevelt Road, Section 4, Taipei 10617, Taiwan

\* E-mail: jlkuo@pub.iams.sinica.edu.tw

### Table of Contents

- A. Normal modes considered in this study for  $(\text{CH}_3\text{OH})_2\text{H}^+$  and its isotopologues: Table S1-S4
- B. Potential energy distribution in internal coordinates for key normal modes of  $(\text{CH}_3\text{OH})_2\text{H}^+$  and its isotopologues: Table S5-S9.
- C. Comparison of vibrational calculations using  $7^4$  versus  $9^4$  DVR grid points: Table S10
- D. Comparison of the RDAV-4D vibrational calculations using MP2 and CCSD(T) at aug-cc-pVDZ and aug-cc-pVTZ basis sets for  $(\text{CH}_3\text{OH})_2\text{H}^+$ : Table S11
- E. Hamiltonian matrix elements for MP2 and CCSD(T) at aug-cc-pVDZ and aug-cc-pVTZ obtained from RDAV-4D vibrational calculations of  $(\text{CH}_3\text{OH})_2\text{H}^+$ : Table S12
- F. Comparison of RDAV-4D and RDAV-5D vibrational calculations for  $(\text{CH}_3\text{OH})_2\text{H}^+$  at MP2/aug-cc-pVDZ: Table S13
- G. Calculated RDAV-5D vibrational frequencies and intensities for  $(\text{CH}_3\text{OH})_2\text{H}^+$  and its isotopologues: Table S14
- H. Comparison of RDAV-4D calculations using MP2 and CCSD(T) at aug-cc-pVDZ basis: Figure S1
- I. Comparison of RDAV-4D vibrational spectrum for  $(\text{CH}_3\text{OH})_2\text{H}^+$  and its isotopologues at MP2/aug-cc-pVDZ and CCSD(T)/aug-cc-pVDZ//MP2/aug-cc-pVDZ: Figure S2
- J. Hamiltonian matrix elements for RDAV-4D vibrational calculations of  $(\text{CH}_3\text{OH})_2\text{H}^+$  and its isotopologues performed at MP2/aug-cc-pVDZ: Table S15
- K. Hamiltonian matrix elements for RDAV-4D vibrational calculations of  $(\text{CH}_3\text{OH})_2\text{H}^+$  and its isotopologues performed at CCSD(T)/aug-cc-pVDZ: Table S16

A. Normal modes considered in this study for  $(\text{CH}_3\text{OH})_2\text{H}^+$  and its isotopologues

Table S1. Key normal modes for MA conformer of  $(\text{CH}_3\text{OH})_2\text{H}^+$  obtained from MP2/aug-cc-pVDZ

| Mode Label in this paper | Mode # in G09 Output | Frequency ( $\text{cm}^{-1}$ ) [Intensity] ( $\text{km mol}^{-1}$ ) | Normal Mode Demonstration                                                             | Description                                                                                                         |
|--------------------------|----------------------|---------------------------------------------------------------------|---------------------------------------------------------------------------------------|---------------------------------------------------------------------------------------------------------------------|
| $\nu_1$                  | 8                    | 577.49 [2.40]                                                       | 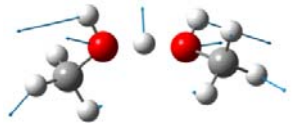    | O-O stretch coupled to $\text{CH}_3$ rock and $\text{H}^+$ bend                                                     |
| $\nu_2$                  | 9                    | 701.67 [2502.82]                                                    |     | O- $\text{H}^+$ -O stretch parallel to the O-O axis coupled to out-of-phase COH deformation and $\text{CH}_3$ rock. |
| $\nu_3$                  | 10                   | 960.50 [94.92]                                                      |     | Out-of-phase C-O stretch coupled to IHB stretch and $\text{CH}_3$ wag                                               |
| $\nu_4$                  | 13                   | 1091.51 [227.36]                                                    |   | Out-of-phase in-plane $\text{CH}_3$ rock coupled to COH deformation and O- $\text{H}^+$ -O stretch/bend hybrid      |
| $\nu_4^*$                | 15                   | 1175.20 [80.95]                                                     |  | Out-of-phase out-plane $\text{CH}_3$ rock coupled to COH deformation and O- $\text{H}^+$ -O stretch/bend hybrid     |

**Table S2.** Key normal modes for MA conformer of  $(\text{CD}_3\text{OH})_2\text{H}^+$  obtained from MP2/aug-cc-pVDZ

| Mode Label in this paper | Mode # in G09 Output | Frequency ( $\text{cm}^{-1}$ ) [Intensity] ( $\text{km mol}^{-1}$ ) | Normal Mode Demonstration                                                             | Description                                                                                                             |
|--------------------------|----------------------|---------------------------------------------------------------------|---------------------------------------------------------------------------------------|-------------------------------------------------------------------------------------------------------------------------|
| $\nu_1$                  | 8                    | 558.17 [2.80]                                                       | 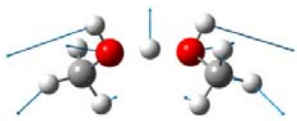   | O-O stretch coupled to $\text{CD}_3$ rock and $\text{H}^+$ bend                                                         |
| $\nu_2$                  | 9                    | 682.73 [2238.78]                                                    |    | $\text{O-H}^+\text{-O}$ stretch parallel to the O-O axis coupled to out-of-phase COH deformation and $\text{CD}_3$ rock |
| $\nu_3$                  | 14                   | 922.34 [43.53]                                                      |    | Out-of-phase C-O stretch coupled to $\text{O-H}^+\text{-O}$ bend/stretch                                                |
| $\nu_4$                  | 11                   | 865.68 [20.43]                                                      |   | Out-of-phase in-plane $\text{CD}_3$ rock coupled to COH deformation and $\text{O-H}^+\text{-O}$ bend                    |
| $\nu_4^*$                | 13                   | 912.83 [248.21]                                                     |  | Out-of-phase out-plane $\text{CD}_3$ rock coupled to COH deformation and $\text{O-H}^+\text{-O}$ stretch                |

**Table S3.** Key normal modes for MA conformer of  $(\text{CH}_3\text{OD})_2\text{D}^+$  obtained from MP2/aug-cc-pVDZ

| Mode Label in this paper | Mode # in G09 Output | Frequency ( $\text{cm}^{-1}$ ) [Intensity] ( $\text{km mol}^{-1}$ ) | Normal Mode Demonstration                                                             | Description                                                                                                           |
|--------------------------|----------------------|---------------------------------------------------------------------|---------------------------------------------------------------------------------------|-----------------------------------------------------------------------------------------------------------------------|
| $\nu_2$                  | 8                    | 524.39 [1238.47]                                                    |     | O-D <sup>+</sup> -O stretch parallel to the O-O axis coupled to out-of-phase COD deformation and CD <sub>3</sub> rock |
| $\nu_1$                  | 9                    | 544.49 [0.00]                                                       |    | O-O stretch coupled to CH <sub>3</sub> rock and D <sup>+</sup> bend                                                   |
| $\nu_4$                  | 11                   | 911.89 [368.66]                                                     |    | Out-of-phase in-plane CH <sub>3</sub> rock coupled to COD deformation and O-D <sup>+</sup> -O stretch                 |
| $\nu_3$                  | 12                   | 927.50 [121.72]                                                     |   | Out-of-phase C-O stretch coupled to O-D <sup>+</sup> -O bend/stretch                                                  |
| $\nu_4^*$                | 14                   | 1083.81 [172.73]                                                    |  | Out-of-phase out-plane CH <sub>3</sub> rock coupled to COD deformation and O-D <sup>+</sup> -O bend                   |

**Table S4.** Key normal modes for MA conformer of  $(\text{CD}_3\text{OD})_2\text{D}^+$  obtained from MP2/aug-cc-pVDZ

| Mode Label in this paper | Mode # in G09 Output | Frequency ( $\text{cm}^{-1}$ ) [Intensity] ( $\text{km mol}^{-1}$ ) | Normal Mode Demonstration                                                             | Description                                                                                                           |
|--------------------------|----------------------|---------------------------------------------------------------------|---------------------------------------------------------------------------------------|-----------------------------------------------------------------------------------------------------------------------|
| $\nu_2$                  | 8                    | 515.27 [1206.88]                                                    |    | O-D <sup>+</sup> -O stretch parallel to the O-O axis coupled to out-of-phase COD deformation and CD <sub>3</sub> rock |
| $\nu_1$                  | 9                    | 530.66 [0.00]                                                       |    | O-O stretch coupled to CD <sub>3</sub> rock and D <sup>+</sup> bend                                                   |
| $\nu_4$                  | 11                   | 795.87 [154.12]                                                     |    | Out-of-phase in-plane CD <sub>3</sub> rock coupled to COD deformation and O-D <sup>+</sup> -O bend                    |
| $\nu_3$                  | 12                   | 887.05 [37.85]                                                      |   | Out-of-phase C-O stretch coupled to O-D <sup>+</sup> -O bend/stretch                                                  |
| $\nu_4^*$                | 14                   | 908.41 [68.82]                                                      |  | Out-of-phase out-plane CD <sub>3</sub> rock coupled to COD deformation and O-D <sup>+</sup> -O bend                   |

**B. Potential energy distribution in internal coordinates for key normal modes of  $(\text{CH}_3\text{OH})_2\text{H}^+$  and its isotopologues.**

**Table S5.** Potential energy distribution in internal coordinates of  $\nu_1$  for MA isotopologues obtained at MP2/aug-cc-pVDZ.

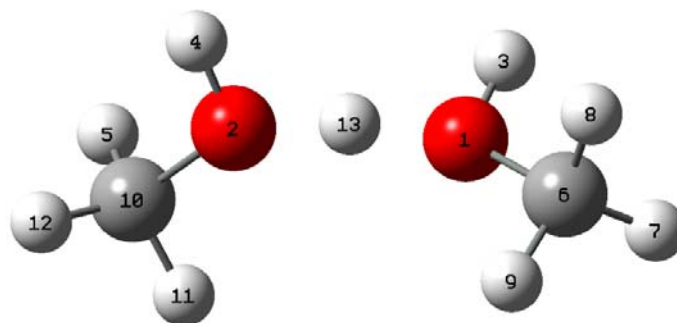

| $\nu_1$ |            | $(\text{CH}_3\text{OH})_2\text{H}^+$ |            | $(\text{CD}_3\text{OH})_2\text{H}^+$ |            | $(\text{CH}_3\text{OD})_2\text{D}^+$ |            | $(\text{CD}_3\text{OD})_2\text{D}^+$ |            |
|---------|------------|--------------------------------------|------------|--------------------------------------|------------|--------------------------------------|------------|--------------------------------------|------------|
| Name    | Definition | Value                                | Weight (%) |
| R2      | R(1,6)     | 0.0706                               | 2.4        | 0.064                                | 2          | -0.0885                              | 2.6        | 0.0881                               | 2.9        |
| R3      | R(1,13)    | 0.2702                               | 9.1        | 0.2472                               | 7.6        | -0.3205                              | 9.6        | 0.3146                               | 10.2       |
| R5      | R(2,10)    | 0.0706                               | 2.4        | 0.064                                | 2          | -0.0885                              | 2.6        | 0.0881                               | 2.9        |
| R6      | R(2,13)    | 0.2702                               | 9.1        | 0.2472                               | 7.6        | -0.3205                              | 9.6        | 0.3146                               | 10.2       |
| A1      | A(3,1,6)   | ---                                  | ---        | ---                                  | ---        | 0.1025                               | 3.1        | -0.079                               | 2.6        |
| A2      | A(3,1,13)  | 0.0992                               | 3.3        | 0.1018                               | 3.1        | -0.0464                              | 1.4        | 0.0449                               | 1.5        |
| A3      | A(6,1,13)  | -0.0823                              | 2.8        | -0.0668                              | 2          | 0.1168                               | 3.5        | -0.1116                              | 3.6        |
| A4      | A(4,2,10)  | ---                                  | ---        | ---                                  | ---        | 0.1025                               | 3.1        | -0.079                               | 2.6        |
| A5      | A(4,2,13)  | 0.0992                               | 3.3        | 0.1018                               | 3.1        | -0.0464                              | 1.4        | 0.0449                               | 1.5        |
| A6      | A(10,2,13) | -0.0823                              | 2.8        | -0.0668                              | 2          | 0.1168                               | 3.5        | -0.1116                              | 3.6        |
| A7      | A(1,6,7)   | ---                                  | ---        | 0.0565                               | 1.7        | ---                                  | ---        | 0.0507                               | 1.6        |
| A9      | A(1,6,9)   | ---                                  | ---        | -0.047                               | 1.4        | ---                                  | ---        | ---                                  | ---        |
| A14     | A(2,10,11) | ---                                  | ---        | -0.047                               | 1.4        | ---                                  | ---        | ---                                  | ---        |

|     |                |         |     |         |     |         |      |         |      |
|-----|----------------|---------|-----|---------|-----|---------|------|---------|------|
| A15 | A(2,10,12)     | ---     | --- | 0.0565  | 1.7 | ---     | ---  | 0.0507  | 1.6  |
| A19 | L(1,13,2,9,-1) | -0.1076 | 3.6 | -0.0957 | 2.9 | 0.095   | 2.8  | -0.0773 | 2.5  |
| A20 | L(1,13,2,9,-2) | 0.0988  | 3.3 | 0.0871  | 2.7 | -0.092  | 2.7  | 0.0735  | 2.4  |
| D1  | D(3,1,2,4)     | -0.1039 | 3.5 | -0.1917 | 5.9 | -0.3764 | 11.2 | 0.3205  | 10.4 |
| D2  | D(3,1,2,10)    | -0.0542 | 1.8 | -0.0971 | 3   | -0.1634 | 4.9  | 0.142   | 4.6  |
| D3  | D(6,1,2,4)     | -0.0542 | 1.8 | -0.0971 | 3   | -0.1634 | 4.9  | 0.142   | 4.6  |
| D4  | D(6,1,2,10)    | ---     | --- | ---     | --- | 0.0497  | 1.5  | ---     | ---  |
| D5  | D(3,1,6,7)     | 0.139   | 4.7 | 0.1604  | 4.9 | 0.0694  | 2.1  | -0.0572 | 1.9  |
| D6  | D(3,1,6,8)     | 0.1543  | 5.2 | 0.1924  | 5.9 | 0.0654  | 2    | -0.0402 | 1.3  |
| D7  | D(3,1,6,9)     | 0.1392  | 4.7 | 0.1624  | 5   | 0.0791  | 2.4  | -0.0705 | 2.3  |
| D8  | D(13,1,6,7)    | 0.0766  | 2.6 | 0.0606  | 1.9 | -0.0833 | 2.5  | 0.0684  | 2.2  |
| D9  | D(13,1,6,8)    | 0.0919  | 3.1 | 0.0926  | 2.8 | -0.0873 | 2.6  | 0.0855  | 2.8  |
| D10 | D(13,1,6,9)    | 0.0768  | 2.6 | 0.0627  | 1.9 | -0.0736 | 2.2  | 0.0551  | 1.8  |
| D11 | D(4,2,10,5)    | 0.1543  | 5.2 | 0.1924  | 5.9 | 0.0654  | 2    | -0.0402 | 1.3  |
| D12 | D(4,2,10,11)   | 0.1392  | 4.7 | 0.1624  | 5   | 0.0791  | 2.4  | -0.0705 | 2.3  |
| D13 | D(4,2,10,12)   | 0.139   | 4.7 | 0.1604  | 4.9 | 0.0694  | 2.1  | -0.0572 | 1.9  |
| D14 | D(13,2,10,5)   | 0.0919  | 3.1 | 0.0926  | 2.8 | -0.0873 | 2.6  | 0.0855  | 2.8  |
| D15 | D(13,2,10,11)  | 0.0768  | 2.6 | 0.0627  | 1.9 | -0.0736 | 2.2  | 0.0551  | 1.8  |
| D16 | D(13,2,10,12)  | 0.0766  | 2.6 | 0.0606  | 1.9 | -0.0833 | 2.5  | 0.0684  | 2.2  |

**Table S6.** Potential energy distribution in internal coordinates of  $\nu_2$  for MA isotopologues obtained at MP2/aug-cc-pVDZ.

| $\nu_2$ |            | $(\text{CH}_3\text{OH})_2\text{H}^+$ |            | $(\text{CD}_3\text{OH})_2\text{H}^+$ |            | $(\text{CH}_3\text{OD})_2\text{D}^+$ |            | $(\text{CD}_3\text{OD})_2\text{D}^+$ |            |
|---------|------------|--------------------------------------|------------|--------------------------------------|------------|--------------------------------------|------------|--------------------------------------|------------|
| Name    | Definition | Value                                | Weight (%) |
| R2      | R(1,6)     | -0.0621                              | 1.3        | -0.0536                              | 1.2        | -0.0387                              | 0.8        | -0.0377                              | 0.8        |
| R3      | R(1,13)    | 0.7512                               | 16.1       | 0.7289                               | 15.7       | 0.7483                               | 15.1       | 0.7454                               | 15.4       |
| R5      | R(2,10)    | 0.0621                               | 1.3        | 0.0536                               | 1.2        | 0.0387                               | 0.8        | 0.0377                               | 0.8        |
| R6      | R(2,13)    | -0.7512                              | 16.1       | -0.7289                              | 15.7       | -0.7483                              | 15.1       | -0.7454                              | 15.4       |

|     |               |         |     |         |     |         |     |         |     |
|-----|---------------|---------|-----|---------|-----|---------|-----|---------|-----|
| A1  | A(3,1,6)      | -0.1755 | 3.8 | -0.1686 | 3.6 | -0.1921 | 3.9 | -0.1886 | 3.9 |
| A2  | A(3,1,13)     | ---     | --- | ---     | --- | -0.0426 | 0.9 | -0.0342 | 0.7 |
| A4  | A(4,2,10)     | 0.1755  | 3.8 | 0.1686  | 3.6 | 0.1921  | 3.9 | 0.1886  | 3.9 |
| A5  | A(4,2,13)     | ---     | --- | ---     | --- | 0.0426  | 0.9 | 0.0342  | 0.7 |
| A7  | A(1,6,7)      | 0.0685  | 1.5 | 0.0945  | 2   | 0.054   | 1.1 | 0.0659  | 1.4 |
| A9  | A(1,6,9)      | 0.0489  | 1   | 0.0634  | 1.4 | 0.0434  | 0.9 | 0.0524  | 1.1 |
| A10 | A(7,6,8)      | -0.0445 | 1   | -0.0529 | 1.1 | -0.0378 | 0.8 | -0.0432 | 0.9 |
| A11 | A(7,6,9)      | -0.0322 | 0.7 | -0.0331 | 0.7 | ---     | --- | ---     | --- |
| A12 | A(8,6,9)      | -0.0439 | 0.9 | -0.0492 | 1.1 | -0.036  | 0.7 | -0.0382 | 0.8 |
| A14 | A(2,10,11)    | -0.0489 | 1   | -0.0634 | 1.4 | -0.0434 | 0.9 | -0.0524 | 1.1 |
| A15 | A(2,10,12)    | -0.0685 | 1.5 | -0.0945 | 2   | -0.054  | 1.1 | -0.0659 | 1.4 |
| A16 | A(5,10,11)    | 0.0439  | 0.9 | 0.0492  | 1.1 | 0.036   | 0.7 | 0.0382  | 0.8 |
| A17 | A(5,10,12)    | 0.0445  | 1   | 0.0529  | 1.1 | 0.0378  | 0.8 | 0.0432  | 0.9 |
| A18 | A(11,10,12)   | 0.0322  | 0.7 | 0.0331  | 0.7 | ---     | --- | ---     | --- |
| D2  | D(3,1,2,10)   | 0.3287  | 7.1 | 0.3096  | 6.7 | 0.3782  | 7.6 | 0.3633  | 7.5 |
| D3  | D(6,1,2,4)    | -0.3287 | 7.1 | -0.3096 | 6.7 | -0.3782 | 7.6 | -0.3633 | 7.5 |
| D5  | D(3,1,6,7)    | -0.2183 | 4.7 | -0.1998 | 4.3 | -0.251  | 5.1 | -0.2327 | 4.8 |
| D6  | D(3,1,6,8)    | -0.2219 | 4.8 | -0.2116 | 4.6 | -0.2565 | 5.2 | -0.2446 | 5.1 |
| D7  | D(3,1,6,9)    | -0.2386 | 5.1 | -0.2389 | 5.2 | -0.2682 | 5.4 | -0.26   | 5.4 |
| D10 | D(13,1,6,9)   | ---     | --- | -0.0313 | 0.7 | ---     | --- | ---     | --- |
| D11 | D(4,2,10,5)   | 0.2219  | 4.8 | 0.2116  | 4.6 | 0.2565  | 5.2 | 0.2446  | 5.1 |
| D12 | D(4,2,10,11)  | 0.2386  | 5.1 | 0.2389  | 5.2 | 0.2682  | 5.4 | 0.26    | 5.4 |
| D13 | D(4,2,10,12)  | 0.2183  | 4.7 | 0.1998  | 4.3 | 0.251   | 5.1 | 0.2327  | 4.8 |
| D15 | D(13,2,10,11) | ---     | --- | 0.0313  | 0.7 | ---     | --- | ---     | --- |



**Table S7.** Potential energy distribution in internal coordinates of  $\nu_3$  for MA isotopologues obtained at MP2/aug-cc-pVDZ.

| $V_3$ |                | $(\text{CH}_3\text{OH})_2\text{H}^+$ |            | $(\text{CD}_3\text{OH})_2\text{H}^+$ |            | $(\text{CH}_3\text{OD})_2\text{D}^+$ |            | $(\text{CD}_3\text{OD})_2\text{D}^+$ |            |
|-------|----------------|--------------------------------------|------------|--------------------------------------|------------|--------------------------------------|------------|--------------------------------------|------------|
| Name  | Definition     | Value                                | Weight (%) |
| R2    | R(1,6)         | -0.5455                              | 13         | -0.4772                              | 16.1       | -0.4346                              | 8.9        | -0.299                               | 8.1        |
| R3    | R(1,13)        | -0.4494                              | 10.7       | -0.2318                              | 7.8        | ---                                  | ---        | -0.1909                              | 5.2        |
| R5    | R(2,10)        | 0.5455                               | 13         | 0.4772                               | 16.1       | 0.4346                               | 8.9        | 0.299                                | 8.1        |
| R6    | R(2,13)        | 0.4494                               | 10.7       | 0.2318                               | 7.8        | ---                                  | ---        | 0.1909                               | 5.2        |
| A1    | A(3,1,6)       | 0.1456                               | 3.5        | 0.0605                               | 2          | 0.1724                               | 3.5        | ---                                  | ---        |
| A2    | A(3,1,13)      | -0.1711                              | 4.1        | -0.1137                              | 3.8        | -0.1086                              | 2.2        | 0.0586                               | 1.6        |
| A3    | A(6,1,13)      | ---                                  | ---        | ---                                  | ---        | -0.195                               | 4          | -0.0869                              | 2.4        |
| A4    | A(4,2,10)      | -0.1456                              | 3.5        | -0.0605                              | 2          | -0.1724                              | 3.5        | ---                                  | ---        |
| A5    | A(4,2,13)      | 0.1711                               | 4.1        | 0.1137                               | 3.8        | 0.1086                               | 2.2        | -0.0586                              | 1.6        |
| A6    | A(10,2,13)     | ---                                  | ---        | ---                                  | ---        | 0.195                                | 4          | 0.0869                               | 2.4        |
| A7    | A(1,6,7)       | 0.0486                               | 1.2        | -0.0308                              | 1          | 0.1616                               | 3.3        | 0.1556                               | 4.2        |
| A8    | A(1,6,8)       | 0.0722                               | 1.7        | -0.0449                              | 1.5        | 0.069                                | 1.4        | -0.2199                              | 6          |
| A9    | A(1,6,9)       | ---                                  | ---        | -0.0336                              | 1.1        | ---                                  | ---        | ---                                  | ---        |
| A10   | A(7,6,8)       | -0.0323                              | 0.8        | 0.0484                               | 1.6        | ---                                  | ---        | ---                                  | ---        |
| A11   | A(7,6,9)       | -0.0529                              | 1.3        | 0.024                                | 0.8        | -0.0635                              | 1.3        | ---                                  | ---        |
| A12   | A(8,6,9)       | -0.0485                              | 1.2        | 0.0287                               | 1          | -0.0758                              | 1.6        | ---                                  | ---        |
| A13   | A(2,10,5)      | -0.0722                              | 1.7        | 0.0449                               | 1.5        | -0.069                               | 1.4        | 0.2199                               | 6          |
| A14   | A(2,10,11)     | ---                                  | ---        | 0.0336                               | 1.1        | ---                                  | ---        | ---                                  | ---        |
| A15   | A(2,10,12)     | -0.0486                              | 1.2        | 0.0308                               | 1          | -0.1616                              | 3.3        | -0.1556                              | 4.2        |
| A16   | A(5,10,11)     | 0.0485                               | 1.2        | -0.0287                              | 1          | 0.0758                               | 1.6        | ---                                  | ---        |
| A17   | A(5,10,12)     | 0.0323                               | 0.8        | -0.0484                              | 1.6        | ---                                  | ---        | ---                                  | ---        |
| A18   | A(11,10,12)    | 0.0529                               | 1.3        | -0.024                               | 0.8        | 0.0635                               | 1.3        | ---                                  | ---        |
| A19   | L(1,13,2,9,-1) | 0.0591                               | 1.4        | 0.0321                               | 1.1        | 0.2883                               | 5.9        | 0.1743                               | 4.7        |
| A20   | L(1,13,2,9,-2) | 0.0744                               | 1.8        | 0.0414                               | 1.4        | 0.3754                               | 7.7        | 0.2248                               | 6.1        |
| D2    | D(3,1,2,10)    | -0.0677                              | 1.6        | ---                                  | ---        | -0.0907                              | 1.9        | -0.0697                              | 1.9        |

|     |               |         |     |         |     |         |     |         |     |
|-----|---------------|---------|-----|---------|-----|---------|-----|---------|-----|
| D3  | D(6,1,2,4)    | 0.0677  | 1.6 | ---     | --- | 0.0907  | 1.9 | 0.0697  | 1.9 |
| D5  | D(3,1,6,7)    | -0.0499 | 1.2 | -0.0369 | 1.2 | -0.0719 | 1.5 | 0.1185  | 3.2 |
| D6  | D(3,1,6,8)    | ---     | --- | -0.0239 | 0.8 | ---     | --- | 0.1052  | 2.9 |
| D7  | D(3,1,6,9)    | ---     | --- | -0.0328 | 1.1 | ---     | --- | ---     | --- |
| D8  | D(13,1,6,7)   | 0.0691  | 1.6 | 0.0677  | 2.3 | 0.1054  | 2.2 | 0.1169  | 3.2 |
| D9  | D(13,1,6,8)   | 0.1032  | 2.5 | 0.0807  | 2.7 | 0.2055  | 4.2 | 0.1036  | 2.8 |
| D10 | D(13,1,6,9)   | 0.096   | 2.3 | 0.0718  | 2.4 | 0.1249  | 2.6 | ---     | --- |
| D11 | D(4,2,10,5)   | ---     | --- | 0.0239  | 0.8 | ---     | --- | -0.1052 | 2.9 |
| D12 | D(4,2,10,11)  | ---     | --- | 0.0328  | 1.1 | ---     | --- | ---     | --- |
| D13 | D(4,2,10,12)  | 0.0499  | 1.2 | 0.0369  | 1.2 | 0.0719  | 1.5 | -0.1185 | 3.2 |
| D14 | D(13,2,10,5)  | -0.1032 | 2.5 | -0.0807 | 2.7 | -0.2055 | 4.2 | -0.1036 | 2.8 |
| D15 | D(13,2,10,11) | -0.096  | 2.3 | -0.0718 | 2.4 | -0.1249 | 2.6 | ---     | --- |
| D16 | D(13,2,10,12) | -0.0691 | 1.6 | -0.0677 | 2.3 | -0.1054 | 2.2 | -0.1169 | 3.2 |

**Table S8.** Potential energy distribution in internal coordinates of  $\nu_4$  for MA isotopologues obtained at MP2/aug-cc-pVDZ.

| $\nu_4$ |            | $(\text{CH}_3\text{OH})_2\text{H}^+$ |            | $(\text{CD}_3\text{OH})_2\text{H}^+$ |            | $(\text{CH}_3\text{OD})_2\text{D}^+$ |            | $(\text{CD}_3\text{OD})_2\text{D}^+$ |            |
|---------|------------|--------------------------------------|------------|--------------------------------------|------------|--------------------------------------|------------|--------------------------------------|------------|
| Name    | Definition | Value                                | Weight (%) |
| R2      | R(1,6)     | ---                                  | ---        | ---                                  | ---        | -0.1067                              | 2.8        | ---                                  | ---        |
| R3      | R(1,13)    | -0.1816                              | 4.8        | -0.0466                              | 1.4        | -0.3726                              | 9.6        | -0.2231                              | 5.8        |
| R5      | R(2,10)    | ---                                  | ---        | ---                                  | ---        | 0.1067                               | 2.8        | ---                                  | ---        |
| R6      | R(2,13)    | 0.1816                               | 4.8        | 0.0466                               | 1.4        | 0.3726                               | 9.6        | 0.2231                               | 5.8        |
| A1      | A(3,1,6)   | -0.1596                              | 4.2        | -0.1096                              | 3.2        | -0.2544                              | 6.6        | -0.184                               | 4.8        |
| A2      | A(3,1,13)  | 0.138                                | 3.6        | 0.1431                               | 4.2        | 0.1825                               | 4.7        | 0.1621                               | 4.2        |
| A3      | A(6,1,13)  | 0.0572                               | 1.5        | 0.0265                               | 0.8        | 0.081                                | 2.1        | 0.0712                               | 1.9        |
| A4      | A(4,2,10)  | 0.1596                               | 4.2        | 0.1096                               | 3.2        | 0.2544                               | 6.6        | 0.184                                | 4.8        |
| A5      | A(4,2,13)  | -0.138                               | 3.6        | -0.1431                              | 4.2        | -0.1825                              | 4.7        | -0.1621                              | 4.2        |
| A6      | A(10,2,13) | -0.0572                              | 1.5        | -0.0265                              | 0.8        | -0.081                               | 2.1        | -0.0712                              | 1.9        |

|     |                |         |     |         |     |         |     |         |     |
|-----|----------------|---------|-----|---------|-----|---------|-----|---------|-----|
| A7  | A(1,6,7)       | -0.1897 | 5   | -0.2227 | 6.5 | -0.1089 | 2.8 | -0.2013 | 5.2 |
| A8  | A(1,6,8)       | -0.0575 | 1.5 | -0.0572 | 1.7 | ---     | --- | -0.0533 | 1.4 |
| A9  | A(1,6,9)       | 0.2234  | 5.9 | 0.2731  | 8   | 0.1402  | 3.6 | 0.2051  | 5.3 |
| A10 | A(7,6,8)       | -0.0511 | 1.3 | -0.0308 | 0.9 | ---     | --- | ---     | --- |
| A12 | A(8,6,9)       | 0.0565  | 1.5 | 0.0309  | 0.9 | ---     | --- | ---     | --- |
| A13 | A(2,10,5)      | 0.0575  | 1.5 | 0.0572  | 1.7 | ---     | --- | 0.0533  | 1.4 |
| A14 | A(2,10,11)     | -0.2234 | 5.9 | -0.2731 | 8   | -0.1402 | 3.6 | -0.2051 | 5.3 |
| A15 | A(2,10,12)     | 0.1897  | 5   | 0.2227  | 6.5 | 0.1089  | 2.8 | 0.2013  | 5.2 |
| A16 | A(5,10,11)     | -0.0565 | 1.5 | -0.0309 | 0.9 | ---     | --- | ---     | --- |
| A17 | A(5,10,12)     | 0.0511  | 1.3 | 0.0308  | 0.9 | ---     | --- | ---     | --- |
| A19 | L(1,13,2,9,-1) | -0.1079 | 2.8 | -0.1132 | 3.3 | -0.0864 | 2.2 | -0.1348 | 3.5 |
| A20 | L(1,13,2,9,-2) | -0.1416 | 3.7 | -0.1487 | 4.4 | -0.1143 | 2.9 | -0.1775 | 4.6 |
| D2  | D(3,1,2,10)    | 0.0921  | 2.4 | 0.05    | 1.5 | 0.1464  | 3.8 | 0.102   | 2.7 |
| D3  | D(6,1,2,4)     | -0.0921 | 2.4 | -0.05   | 1.5 | -0.1464 | 3.8 | -0.102  | 2.7 |
| D5  | D(3,1,6,7)     | 0.1372  | 3.6 | 0.1405  | 4.1 | 0.1241  | 3.2 | 0.1314  | 3.4 |
| D6  | D(3,1,6,8)     | -0.0779 | 2.1 | -0.0701 | 2.1 | ---     | --- | ---     | --- |
| D7  | D(3,1,6,9)     | 0.0876  | 2.3 | 0.0939  | 2.7 | 0.0956  | 2.5 | 0.0948  | 2.5 |
| D9  | D(13,1,6,8)    | -0.1754 | 4.6 | -0.1962 | 5.7 | -0.0818 | 2.1 | -0.1639 | 4.3 |
| D10 | D(13,1,6,9)    | ---     | --- | -0.0322 | 0.9 | ---     | --- | ---     | --- |
| D11 | D(4,2,10,5)    | 0.0779  | 2.1 | 0.0701  | 2.1 | ---     | --- | ---     | --- |
| D12 | D(4,2,10,11)   | -0.0876 | 2.3 | -0.0939 | 2.7 | -0.0956 | 2.5 | -0.0948 | 2.5 |
| D13 | D(4,2,10,12)   | -0.1372 | 3.6 | -0.1405 | 4.1 | -0.1241 | 3.2 | -0.1314 | 3.4 |
| D14 | D(13,2,10,5)   | 0.1754  | 4.6 | 0.1962  | 5.7 | 0.0818  | 2.1 | 0.1639  | 4.3 |
| D15 | D(13,2,10,11)  | ---     | --- | 0.0322  | 0.9 | ---     | --- | ---     | --- |

**Table S9.** Potential energy distribution in internal coordinates of  $\nu_4^*$  for MA isotopologues obtained at MP2/aug-cc-pVDZ.

| $\nu_4^*$ |                | $(\text{CH}_3\text{OH})_2\text{H}^+$ |            | $(\text{CD}_3\text{OH})_2\text{H}^+$ |            | $(\text{CH}_3\text{OD})_2\text{D}^+$ |            | $(\text{CD}_3\text{OD})_2\text{D}^+$ |            |
|-----------|----------------|--------------------------------------|------------|--------------------------------------|------------|--------------------------------------|------------|--------------------------------------|------------|
| Name      | Definition     | Value                                | Weight (%) |
| R2        | R(1,6)         | ---                                  | ---        | ---                                  | ---        | -0.1684                              | 3          | -0.231                               | 5.6        |
| R3        | R(1,13)        | 0.1363                               | 3.7        | 0.3268                               | 7.5        | 0.0827                               | 1.5        | 0.0924                               | 2.3        |
| R5        | R(2,10)        | ---                                  | ---        | ---                                  | ---        | 0.1684                               | 3          | 0.231                                | 5.6        |
| R6        | R(2,13)        | -0.1363                              | 3.7        | -0.3268                              | 7.5        | -0.0827                              | 1.5        | -0.0924                              | 2.3        |
| A1        | A(3,1,6)       | ---                                  | ---        | -0.0735                              | 1.7        | 0.1648                               | 3          | -0.0314                              | 0.8        |
| A2        | A(3,1,13)      | ---                                  | ---        | -0.0646                              | 1.5        | -0.3028                              | 5.5        | -0.0831                              | 2          |
| A3        | A(6,1,13)      | ---                                  | ---        | ---                                  | ---        | 0.3734                               | 6.7        | ---                                  | ---        |
| A4        | A(4,2,10)      | ---                                  | ---        | 0.0735                               | 1.7        | -0.1648                              | 3          | 0.0314                               | 0.8        |
| A5        | A(4,2,13)      | ---                                  | ---        | 0.0646                               | 1.5        | 0.3028                               | 5.5        | 0.0831                               | 2          |
| A6        | A(10,2,13)     | ---                                  | ---        | ---                                  | ---        | -0.3734                              | 6.7        | ---                                  | ---        |
| A7        | A(1,6,7)       | -0.2047                              | 5.6        | -0.1884                              | 4.3        | ---                                  | ---        | -0.187                               | 4.6        |
| A8        | A(1,6,8)       | 0.3119                               | 8.5        | 0.3635                               | 8.4        | 0.1287                               | 2.3        | 0.3287                               | 8          |
| A9        | A(1,6,9)       | -0.088                               | 2.4        | -0.0802                              | 1.8        | ---                                  | ---        | -0.1411                              | 3.4        |
| A11       | A(7,6,9)       | -0.1117                              | 3.1        | -0.0728                              | 1.7        | ---                                  | ---        | -0.0492                              | 1.2        |
| A12       | A(8,6,9)       | 0.0595                               | 1.6        | ---                                  | ---        | ---                                  | ---        | ---                                  | ---        |
| A13       | A(2,10,5)      | -0.3119                              | 8.5        | -0.3635                              | 8.4        | -0.1287                              | 2.3        | -0.3287                              | 8          |
| A14       | A(2,10,11)     | 0.088                                | 2.4        | 0.0802                               | 1.8        | ---                                  | ---        | 0.1411                               | 3.4        |
| A15       | A(2,10,12)     | 0.2047                               | 5.6        | 0.1884                               | 4.3        | ---                                  | ---        | 0.187                                | 4.6        |
| A16       | A(5,10,11)     | -0.0595                              | 1.6        | ---                                  | ---        | ---                                  | ---        | ---                                  | ---        |
| A18       | A(11,10,12)    | 0.1117                               | 3.1        | 0.0728                               | 1.7        | ---                                  | ---        | 0.0492                               | 1.2        |
| A19       | L(1,13,2,9,-1) | -0.0495                              | 1.4        | ---                                  | ---        | -0.5258                              | 9.5        | ---                                  | ---        |
| A20       | L(1,13,2,9,-2) | -0.061                               | 1.7        | ---                                  | ---        | -0.6794                              | 12.3       | 0.0335                               | 0.8        |
| D2        | D(3,1,2,10)    | 0.0901                               | 2.5        | 0.2162                               | 5          | ---                                  | ---        | 0.1537                               | 3.8        |
| D3        | D(6,1,2,4)     | -0.0901                              | 2.5        | -0.2162                              | 5          | ---                                  | ---        | -0.1537                              | 3.8        |
| D5        | D(3,1,6,7)     | -0.1798                              | 4.9        | -0.2344                              | 5.4        | -0.1163                              | 2.1        | -0.197                               | 4.8        |

|     |               |         |     |         |     |         |     |         |     |
|-----|---------------|---------|-----|---------|-----|---------|-----|---------|-----|
| D6  | D(3,1,6,8)    | -0.0924 | 2.5 | -0.1593 | 3.7 | -0.0916 | 1.7 | -0.0946 | 2.3 |
| D7  | D(3,1,6,9)    | 0.0914  | 2.5 | ---     | --- | ---     | --- | ---     | --- |
| D8  | D(13,1,6,7)   | -0.1089 | 3   | -0.0554 | 1.3 | -0.2069 | 3.7 | ---     | --- |
| D9  | D(13,1,6,8)   | ---     | --- | ---     | --- | -0.1822 | 3.3 | 0.0847  | 2.1 |
| D10 | D(13,1,6,9)   | 0.1623  | 4.4 | 0.1591  | 3.7 | -0.1198 | 2.2 | 0.1996  | 4.9 |
| D11 | D(4,2,10,5)   | 0.0924  | 2.5 | 0.1593  | 3.7 | 0.0916  | 1.7 | 0.0946  | 2.3 |
| D12 | D(4,2,10,11)  | -0.0914 | 2.5 | ---     | --- | ---     | --- | ---     | --- |
| D13 | D(4,2,10,12)  | 0.1798  | 4.9 | 0.2344  | 5.4 | 0.1163  | 2.1 | 0.197   | 4.8 |
| D14 | D(13,2,10,5)  | ---     | --- | ---     | --- | 0.1822  | 3.3 | -0.0847 | 2.1 |
| D15 | D(13,2,10,11) | -0.1623 | 4.4 | -0.1591 | 3.7 | 0.1198  | 2.2 | -0.1996 | 4.9 |
| D16 | D(13,2,10,12) | 0.1089  | 3   | 0.0554  | 1.3 | 0.2069  | 3.7 | ---     | --- |

### C. Comparison of vibrational calculations using $7^4$ versus $9^4$ DVR grid points

**Table S10.** RDAV-4D calculations using  $7^4=2401$  and  $9^4=6561$  shows that the frequencies agreed within  $2\text{ cm}^{-1}$ .

| MP2/aug-cc-pVDZ |                                |                                    |                                |                                    |
|-----------------|--------------------------------|------------------------------------|--------------------------------|------------------------------------|
| State           | 7x7x7x7 DVR Grids              |                                    | 9x9x9x9 DVR Grids              |                                    |
|                 | Frequency ( $\text{cm}^{-1}$ ) | Intensity ( $\text{km mol}^{-1}$ ) | Frequency ( $\text{cm}^{-1}$ ) | Intensity ( $\text{km mol}^{-1}$ ) |
| 0               | 0.0                            | N/A                                | 0.0                            | N/A                                |
| 1               | 563.5                          | 2.4                                | 562.8                          | 2.4                                |
| 2               | 896.1                          | 1158.8                             | 896.9                          | 1126.9                             |
| 3               | 1006.6                         | 728.1                              | 1007.8                         | 739.4                              |
| 4               | 1114.5                         | 471.3                              | 1114.7                         | 478.5                              |
| 5               | 1124.5                         | 0.0                                | 1123.6                         | 0.0                                |

### D. Comparison of the RDAV-4D vibrational calculations using MP2 and CCSD(T) at aug-cc-pVDZ and aug-cc-pVTZ basis sets for $(\text{CH}_3\text{OH})_2\text{H}^+$

**Table S11.** Frequencies and intensities for  $(\text{CH}_3\text{OH})_2\text{H}^+$  obtained by a RDAV-4D calculation using MP2/aug-cc-pVDZ and CCSD(T)/aug-cc-pVDZ//MP2/aug-cc-pVDZ. The entries highlighted in green are the three major bands centered around  $1000\text{ cm}^{-1}$ . The orange highlighted entries refer to the combination bands around  $1500\text{ cm}^{-1}$ .

| State | MP2                            |                                    |                                |                                    | CCSD(T)                        |                                    |                                |                                    |
|-------|--------------------------------|------------------------------------|--------------------------------|------------------------------------|--------------------------------|------------------------------------|--------------------------------|------------------------------------|
|       | aug-cc-pVDZ                    |                                    | aug-cc-pVTZ                    |                                    | aug-cc-pVDZ                    |                                    | aug-cc-pVTZ                    |                                    |
|       | Frequency ( $\text{cm}^{-1}$ ) | Intensity ( $\text{km mol}^{-1}$ ) | Frequency ( $\text{cm}^{-1}$ ) | Intensity ( $\text{km mol}^{-1}$ ) | Frequency ( $\text{cm}^{-1}$ ) | Intensity ( $\text{km mol}^{-1}$ ) | Frequency ( $\text{cm}^{-1}$ ) | Intensity ( $\text{km mol}^{-1}$ ) |
| 0     | 0                              | 0                                  | 0                              | 0                                  | 0                              | 0                                  | 0                              | 0                                  |
| 1     | 563                            | 2                                  | 567                            | 2                                  | 559                            | 3                                  | 564                            | 2                                  |
| 2     | 896                            | 1159                               | 944                            | 724                                | 865                            | 1733                               | 924                            | 1299                               |
| 3     | 1007                           | 728                                | 1052                           | 697                                | 992                            | 515                                | 1036                           | 699                                |
| 4     | 1115                           | 471                                | 1131                           | 0                                  | 1096                           | 327                                | 1123                           | 0                                  |
| 5     | 1125                           | 0                                  | 1151                           | 1115                               | 1115                           | 0                                  | 1126                           | 747                                |
| 6     | 1455                           | 146                                | 1506                           | 127                                | 1415                           | 221                                | 1479                           | 238                                |
| 7     | 1561                           | 102                                | 1613                           | 187                                | 1541                           | 64                                 | 1588                           | 155                                |
| 8     | 1673                           | 14                                 | 1698                           | 0                                  | 1652                           | 7                                  | 1680                           | 30                                 |
| 9     | 1685                           | 0                                  | 1702                           | 66                                 | 1669                           | 0                                  | 1686                           | 0                                  |
| 10    | 1813                           | 0                                  | 1894                           | 0                                  | 1767                           | 0                                  | 1858                           | 0                                  |

**E. Hamiltonian matrix elements for MP2 and CCSD(T) at aug-cc-pVDZ and aug-cc-pVTZ obtained from RDAV-4D vibrational calculations of  $(\text{CH}_3\text{OH})_2\text{H}^+$ .**

**Table S12.** Hamiltonian matrix elements ( $\text{cm}^{-1}$ ) for the RDAV-4D vibrational calculation at MP2 and CCSD(T) with aug-cc-pVDZ and aug-cc-pVTZ as basis.

|             |                                | MP2                |                    |                    |                    |  |
|-------------|--------------------------------|--------------------|--------------------|--------------------|--------------------|--|
| aug-cc-pVDZ | $\langle n_1, n_2, n_3, n_4  $ | $ 0,1,0,0 \rangle$ | $ 1,1,0,0 \rangle$ | $ 0,0,1,0 \rangle$ | $ 0,0,0,1 \rangle$ |  |
|             | $\langle 0,1,0,0  $            | 1092               | 303                | -101               | -71                |  |
|             | $\langle 1,1,0,0  $            | 303                | 1693               | -67                | -56                |  |
|             | $\langle 0,0,1,0  $            | -101               | -67                | 1003               | 24                 |  |
|             | $\langle 0,0,0,1  $            | -71                | -56                | 24                 | 1124               |  |
|             |                                |                    |                    |                    |                    |  |
| aug-cc-pVTZ | $\langle n_1, n_2, n_3, n_4  $ | $ 0,1,0,0 \rangle$ | $ 1,1,0,0 \rangle$ | $ 0,0,1,0 \rangle$ | $ 0,0,0,1 \rangle$ |  |
|             | $\langle 0,1,0,0  $            | 1218               | 339                | -124               | -112               |  |
|             | $\langle 1,1,0,0  $            | 339                | 1823               | -77                | -80                |  |
|             | $\langle 0,0,1,0  $            | -124               | -77                | 1038               | 41                 |  |
|             | $\langle 0,0,0,1  $            | -112               | -80                | 41                 | 1160               |  |
|             |                                |                    |                    |                    |                    |  |

|             |                                | CCSD(T)            |                    |                    |                    |  |
|-------------|--------------------------------|--------------------|--------------------|--------------------|--------------------|--|
| aug-cc-pVDZ | $\langle n_1, n_2, n_3, n_4  $ | $ 0,1,0,0 \rangle$ | $ 1,1,0,0 \rangle$ | $ 0,0,1,0 \rangle$ | $ 0,0,0,1 \rangle$ |  |
|             | $\langle 0,1,0,0  $            | 1052               | 307                | -96                | -61                |  |
|             | $\langle 1,1,0,0  $            | 307                | 1651               | -68                | -58                |  |
|             | $\langle 0,0,1,0  $            | -96                | -68                | 1003               | 22                 |  |
|             | $\langle 0,0,0,1  $            | -61                | -58                | 22                 | 1110               |  |
|             |                                |                    |                    |                    |                    |  |
| aug-cc-pVTZ | $\langle n_1, n_2, n_3, n_4  $ | $ 0,1,0,0 \rangle$ | $ 1,1,0,0 \rangle$ | $ 0,0,1,0 \rangle$ | $ 0,0,0,1 \rangle$ |  |
|             | $\langle 0,1,0,0  $            | 1180               | 346                | -121               | -102               |  |
|             | $\langle 1,1,0,0  $            | 346                | 1785               | -79                | -83                |  |
|             | $\langle 0,0,1,0  $            | -121               | -79                | 1040               | 39                 |  |
|             | $\langle 0,0,0,1  $            | -102               | -83                | 39                 | 1149               |  |
|             |                                |                    |                    |                    |                    |  |

**F. Comparison of RDAV-4D and RDAV-5D vibrational calculations for (CH<sub>3</sub>OH)<sub>2</sub>H<sup>+</sup> at MP2/aug-cc-pVDZ**

**Table S13.** Comparison between RDAV-4D and RDAV-5D vibrational calculations reveals that peak positions does not shift significantly (<50 cm<sup>-1</sup>) upon inclusion of the out-of-phase out-plane CH<sub>3</sub> rock ( $\nu_4^*$ ). The frequency in red is corresponds to  $\nu_4^*$ , which is not included in the RDAV-4D calculation.

| MP2/aug-cc-pVDZ |                               |                                   |                               |                                   |
|-----------------|-------------------------------|-----------------------------------|-------------------------------|-----------------------------------|
| State           | RDAV-4D calculation           |                                   | RDAV-5D calculation           |                                   |
|                 | Frequency (cm <sup>-1</sup> ) | Intensity (km mol <sup>-1</sup> ) | Frequency (cm <sup>-1</sup> ) | Intensity (km mol <sup>-1</sup> ) |
| 0               | 0                             | 0                                 | 0                             | 0                                 |
| 1               | 563                           | 2                                 | 563                           | 2                                 |
| 2               | 896                           | 1159                              | 896                           | 1138                              |
| 3               | 1007                          | 728                               | 1006                          | 678                               |
| 4               | 1115                          | 471                               | 1116                          | 401                               |
| 5               | 1125                          | 0                                 | 1124                          | 0                                 |
| 6               | 1455                          | 146                               | <b>1189</b>                   | 181                               |
| 7               | 1561                          | 102                               | 1457                          | 162                               |
| 8               | 1673                          | 14                                | 1561                          | 112                               |
| 9               | 1685                          | 0                                 | 1676                          | 15                                |
| 10              | 1813                          | 0                                 | 1685                          | 0                                 |



**G. Calculated RDAV-5D vibrational frequencies and intensities for  $(\text{CH}_3\text{OH})_2\text{H}^+$  and its isotopologues.**

**Table S14.** Calculated RDAV- 5D vibrational frequencies and intensities for the  $(\text{CH}_3\text{OH})_2\text{H}^+$  and its isotopologues. In all calculations, seven DVR grids were used.

| State | MP2/aug-cc-pVDZ                      |                      |                                      |                      |                                      |                      |                                      |                      |
|-------|--------------------------------------|----------------------|--------------------------------------|----------------------|--------------------------------------|----------------------|--------------------------------------|----------------------|
|       | $(\text{CH}_3\text{OH})_2\text{H}^+$ |                      | $(\text{CD}_3\text{OH})_2\text{H}^+$ |                      | $(\text{CH}_3\text{OD})_2\text{D}^+$ |                      | $(\text{CD}_3\text{OD})_2\text{D}^+$ |                      |
|       | $\text{cm}^{-1}$                     | $\text{km mol}^{-1}$ |
| 0     | 0                                    | 0                    | 0                                    | 0                    | 0                                    | 0                    | 0                                    | 0                    |
| 1     | 563                                  | 2                    | 549                                  | 3                    | 530                                  | 0                    | 519                                  | 0                    |
| 2     | 896                                  | 1138                 | 857                                  | 700                  | 653                                  | 991                  | 644                                  | 967                  |
| 3     | 1006                                 | 678                  | 873                                  | 43                   | 927                                  | 50                   | 809                                  | 205                  |
| 4     | 1116                                 | 401                  | 920                                  | 106                  | 929                                  | 394                  | 891                                  | 51                   |
| 5     | 1124                                 | 0                    | 979                                  | 1341                 | 1057                                 | 0                    | 912                                  | 90                   |
| 6     | 1189                                 | 181                  | 1097                                 | 0                    | 1071                                 | 203                  | 1036                                 | 0                    |
| 7     | 1457                                 | 162                  | 1405                                 | 87                   | 1186                                 | 156                  | 1156                                 | 76                   |
| 8     | 1561                                 | 112                  | 1425                                 | 2                    | 1388                                 | 0                    | 1326                                 | 4                    |
| 9     | 1676                                 | 15                   | 1468                                 | 2                    | 1445                                 | 10                   | 1368                                 | 0                    |
| 10    | 1685                                 | 0                    | 1517                                 | 103                  | 1455                                 | 0                    | 1407                                 | 1                    |
| 11    | 1748                                 | 5                    | 1645                                 | 0                    | 1571                                 | 0                    | 1430                                 | 1                    |
| 12    | 1813                                 | 0                    | 1729                                 | 0                    | 1580                                 | 0                    | 1475                                 | 0                    |
| 13    | 1951                                 | 0                    | 1734                                 | 0                    | 1597                                 | 1                    | 1538                                 | 0                    |
| 14    | 2013                                 | 0                    | 1750                                 | 0                    | 1633                                 | 0                    | 1550                                 | 0                    |

H. Comparison of the stick spectrum for RDAV-4D and RDAV-5D calculations using MP2/aug-cc-pVDZ.

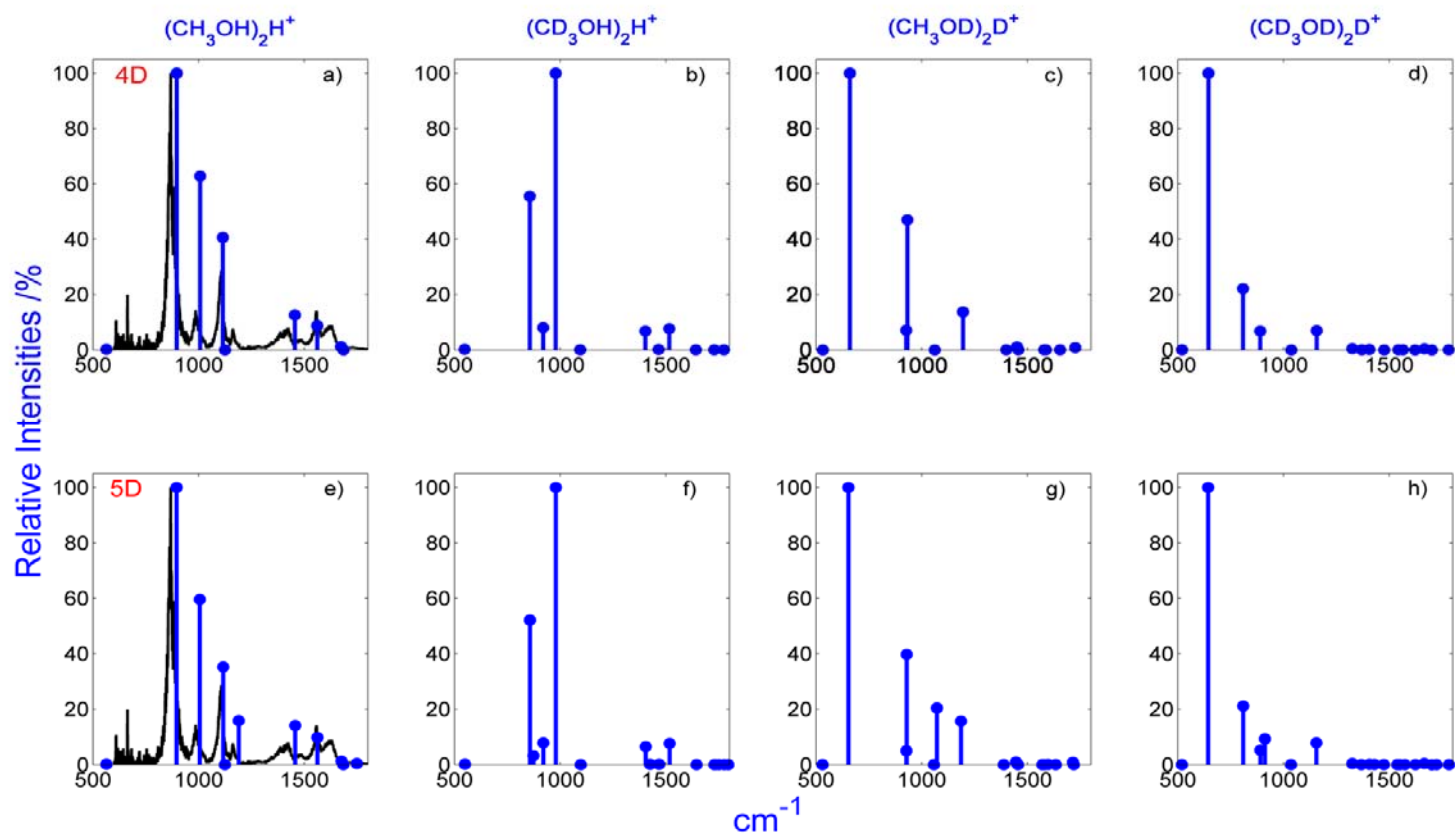

**Figure S1.** A comparison of the RDAV-4D (a-d) and RDAV-5D (e-h) calculations at MP2 aug-cc-pVDZ as basis, note that there are no significant differences between the peak positions of the RDAV-5D stick spectrum.

I. Comparison of 4D vibrational spectrum for  $(\text{CH}_3\text{OH})_2\text{H}^+$  and its isotopologues at MP2/aug-cc-pVDZ and CCSD(T)/aug-cc-pVDZ//MP2/aug-cc-pVDZ.

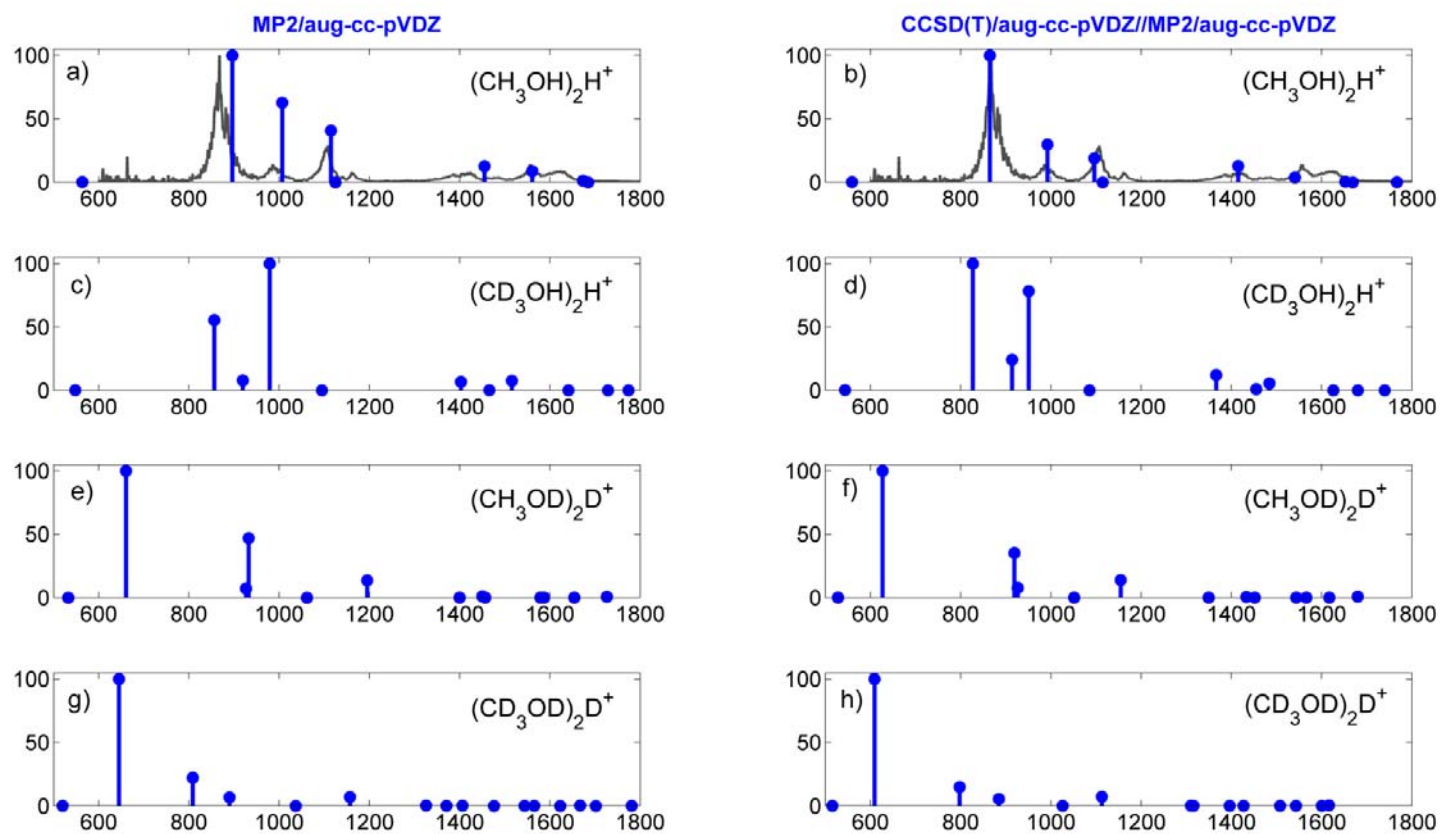

**Figure S2.** Comparison of RDAV-4D vibrational spectrum for  $(\text{CH}_3\text{OH})_2\text{H}^+$  and its isotopologues at MP2/aug-cc-pVDZ and CCSD(T)/aug-cc-pVDZ//MP2/aug-cc-pVDZ.

**J. Hamiltonian matrix elements for 4D vibrational calculations of  $(\text{CH}_3\text{OH})_2\text{H}^+$  and its isotopologues performed at MP2/aug-cc-pVDZ.**

**Table S15.** Hamiltonian matrix elements ( $\text{cm}^{-1}$ ) for the 4D vibrational calculation at MP2 with aug-cc-pVDZ as basis set.

| $(\text{CH}_3\text{OH})_2\text{H}^+$ |                    |                    |                    |                    |
|--------------------------------------|--------------------|--------------------|--------------------|--------------------|
| $\langle m_1, m_2, m_3, m_4  $       | $ 0,1,0,0 \rangle$ | $ 1,1,0,0 \rangle$ | $ 0,0,1,0 \rangle$ | $ 0,0,0,1 \rangle$ |
| $\langle 0,1,0,0  $                  | 1092               | 303                | -101               | -71                |
| $\langle 1,1,0,0  $                  | 303                | 1693               | -67                | -56                |
| $\langle 0,0,1,0  $                  | -101               | -67                | 1003               | 24                 |
| $\langle 0,0,0,1  $                  | -71                | -56                | 24                 | 1124               |
|                                      |                    |                    |                    |                    |
| $(\text{CD}_3\text{OH})_2\text{H}^+$ |                    |                    |                    |                    |
| $\langle m_1, m_2, m_3, m_4^*  $     | $ 0,1,0,0 \rangle$ | $ 1,1,0,0 \rangle$ | $ 0,0,0,1 \rangle$ | $ 0,0,1,0 \rangle$ |
| $\langle 0,1,0,0  $                  | 1034               | 274                | 98                 | -49                |
| $\langle 1,1,0,0  $                  | 274                | 1615               | 68                 | -32                |
| $\langle 0,0,0,1  $                  | 98                 | 68                 | 953                | -18                |
| $\langle 0,0,1,0  $                  | -49                | -32                | -18                | 937                |

| $(\text{CH}_3\text{OD})_2\text{D}^+$ |                    |                    |                    |                    |
|--------------------------------------|--------------------|--------------------|--------------------|--------------------|
| $\langle m_1, m_2, m_3, m_4  $       | $ 0,1,0,0 \rangle$ | $ 1,1,0,0 \rangle$ | $ 0,0,0,1 \rangle$ | $ 0,0,1,0 \rangle$ |
| $\langle 0,1,0,0  $                  | 753                | -217               | -84                | 1                  |
| $\langle 1,1,0,0  $                  | -217               | 1314               | 81                 | -10                |
| $\langle 0,0,0,1  $                  | -84                | 81                 | 967                | -3                 |
| $\langle 0,0,1,0  $                  | 1                  | -10                | -3                 | 930                |
|                                      |                    |                    |                    |                    |
| $(\text{CD}_3\text{OD})_2\text{D}^+$ |                    |                    |                    |                    |
| $\langle m_1, m_2, m_3, m_4  $       | $ 0,1,0,0 \rangle$ | $ 1,1,0,0 \rangle$ | $ 0,0,1,0 \rangle$ | $ 0,0,0,1 \rangle$ |
| $\langle 0,1,0,0  $                  | 724                | 198                | -44                | -33                |
| $\langle 1,1,0,0  $                  | 198                | 1270               | -46                | -26                |
| $\langle 0,0,1,0  $                  | -44                | -46                | 817                | 12                 |
| $\langle 0,0,0,1  $                  | -33                | -26                | 12                 | 895                |

**K. Hamiltonian matrix elements for 4D vibrational calculations of  $(\text{CH}_3\text{OH})_2\text{H}^+$  and its isotopologues performed at CCSD(T)/aug-cc-pVDZ.**

**Table S16.** Hamiltonian matrix elements ( $\text{cm}^{-1}$ ) for the 4D vibrational calculation at CCSD(T) with aug-cc-pVDZ as basis set.

| $(\text{CH}_3\text{OH})_2\text{H}^+$ |                    |                    |                    |                    |
|--------------------------------------|--------------------|--------------------|--------------------|--------------------|
| $\langle m_1, m_2, m_3, m_4  $       | $ 0,1,0,0 \rangle$ | $ 1,1,0,0 \rangle$ | $ 0,0,1,0 \rangle$ | $ 0,0,0,1 \rangle$ |
| $\langle 0,1,0,0  $                  | 1052               | 307                | -96                | -61                |
| $\langle 1,1,0,0  $                  | 307                | 1651               | -68                | -58                |
| $\langle 0,0,1,0  $                  | -96                | -68                | 1003               | 22                 |
| $\langle 0,0,0,1  $                  | -61                | -58                | 22                 | 1110               |
|                                      |                    |                    |                    |                    |
| $(\text{CD}_3\text{OH})_2\text{H}^+$ |                    |                    |                    |                    |
| $\langle m_1, m_2, m_3, m_4^*  $     | $ 0,1,0,0 \rangle$ | $ 1,1,0,0 \rangle$ | $ 0,0,0,1 \rangle$ | $ 0,0,1,0 \rangle$ |
| $\langle 0,1,0,0  $                  | 995                | 279                | 90                 | -48                |
| $\langle 1,1,0,0  $                  | 279                | 1574               | 70                 | -32                |
| $\langle 0,0,0,1  $                  | 90                 | 70                 | 939                | -17                |
| $\langle 0,0,1,0  $                  | -48                | -32                | -17                | 936                |

| $(\text{CH}_3\text{OD})_2\text{D}^+$ |                    |                    |                    |                    |
|--------------------------------------|--------------------|--------------------|--------------------|--------------------|
| $\langle m_1, m_2, m_3, m_4  $       | $ 0,1,0,0 \rangle$ | $ 1,1,0,0 \rangle$ | $ 0,0,0,1 \rangle$ | $ 0,0,1,0 \rangle$ |
| $\langle 0,1,0,0  $                  | 722                | -222               | 70                 | 6                  |
| $\langle 1,1,0,0  $                  | -222               | 1283               | -83                | 11                 |
| $\langle 0,0,0,1  $                  | 70                 | -83                | 960                | 0                  |
| $\langle 0,0,1,0  $                  | 6                  | 11                 | 0                  | 929                |
|                                      |                    |                    |                    |                    |
| $(\text{CD}_3\text{OD})_2\text{D}^+$ |                    |                    |                    |                    |
| $\langle m_1, m_2, m_3, m_4  $       | $ 0,1,0,0 \rangle$ | $ 1,1,0,0 \rangle$ | $ 0,0,0,1 \rangle$ | $ 0,0,1,0 \rangle$ |
| $\langle 0,1,0,0  $                  | 692                | 203                | -34                | -33                |
| $\langle 1,1,0,0  $                  | 203                | 1235               | -47                | -26                |
| $\langle 0,0,0,1  $                  | -34                | -47                | 808                | 11                 |
| $\langle 0,0,1,0  $                  | -33                | -26                | 11                 | 891                |
